# Supplementary material for: Intermittent pneumatic compression for venous thromboembolism prevention: a systematic review on factors affecting adherence
Source: PubMed Central journal article supplement — BMJ Open. 2020 Sep 3;10(9):e037036. doi: 10.1136/bmjopen-2020-037036 (PMC7473613; doi:10.1136/bmjopen-2020-037036), 2020-09-03
Supplement: bmjopen-2020-037036supp001.pdf [file bmjopen-2020-037036supp001.pdf]

## Supplementary file

*Intermittent pneumatic compression for venous thromboembolism prevention: a systematic review on factors affecting adherence*

### Search strategy

| Population                                                   | Intervention                                                                                                                                                                                                                                                                                                                                                        | Comparison | Outcomes                                                                                          |
|--------------------------------------------------------------|---------------------------------------------------------------------------------------------------------------------------------------------------------------------------------------------------------------------------------------------------------------------------------------------------------------------------------------------------------------------|------------|---------------------------------------------------------------------------------------------------|
| Intermittent pneumatic compression OR Sequential compression | Interven\$ OR Strateg\$ OR Guideline\$ OR Educat\$ OR Inform\$ OR PDSA OR Plan do study act OR Improv\$ OR Implement\$ OR Toleran\$ OR Aware\$ OR Present\$ OR Program\$ OR Plan\$ OR Approach\$ OR Project\$ OR Procedure\$ OR Polic\$ OR Method\$ OR Design\$ OR Action\$ OR Part\$ OR Involv\$ OR Practice\$ OR Process\$ OR System\$ OR Technique\$ OR Scheme\$ | N/A        | Complian\$ OR Adhere\$ OR Efficacy OR Effective\$ OR Outcome\$ OR Success\$ OR Fail\$ OR Fidelity |

### Medline Search

1. (Complian\$ or Adhere\$ or Efficacy or Effective\$ or Outcome\$ or Success\$ or Fail\$ or Fidelity).mp. [mp=title, abstract, original title, name of substance word, subject heading word, keyword heading word, protocol supplementary concept word, rare disease supplementary concept word, unique identifier, synonyms]
2. (Interven\$ or Strateg\$ or Guideline\$ or Educat\$ or Inform\$ or PDSA or Plan do study act or Improv\$ or Implement\$ or Toleran\$ or Aware\$ or Present\$ or Program\$ or Plan\$ or Approach\$ or Project\$ or Procedure\$ or Polic\$ or Method\$ or Design\$ or Action\$ or Part\$ or Involv\$ or Practice\$ or Process\$ or System\$ or Technique\$ or Scheme\$).mp. [mp=title, abstract, original title, name of substance word, subject heading word, keyword heading word, protocol supplementary concept word, rare disease supplementary concept word, unique identifier, synonyms]
3. (Intermittent pneumatic compression or Sequential compression).mp. [mp=title, abstract, original title, name of substance word, subject heading word, keyword heading word, protocol supplementary concept word, rare disease supplementary concept word, unique identifier, synonyms]
4. 1 and 2 and 3

### Filters

English language

Dates - January 1960 – May 2019
